# Supplementary material
Source: Springer Nature journal article supplement (https://www.springermedizin.de/resource/supplementary/12913_2013_2828_MOESM2_ESM.pdf/9531582)

## Ringkoebing-Skjern municipality

## Neighbouring municipality

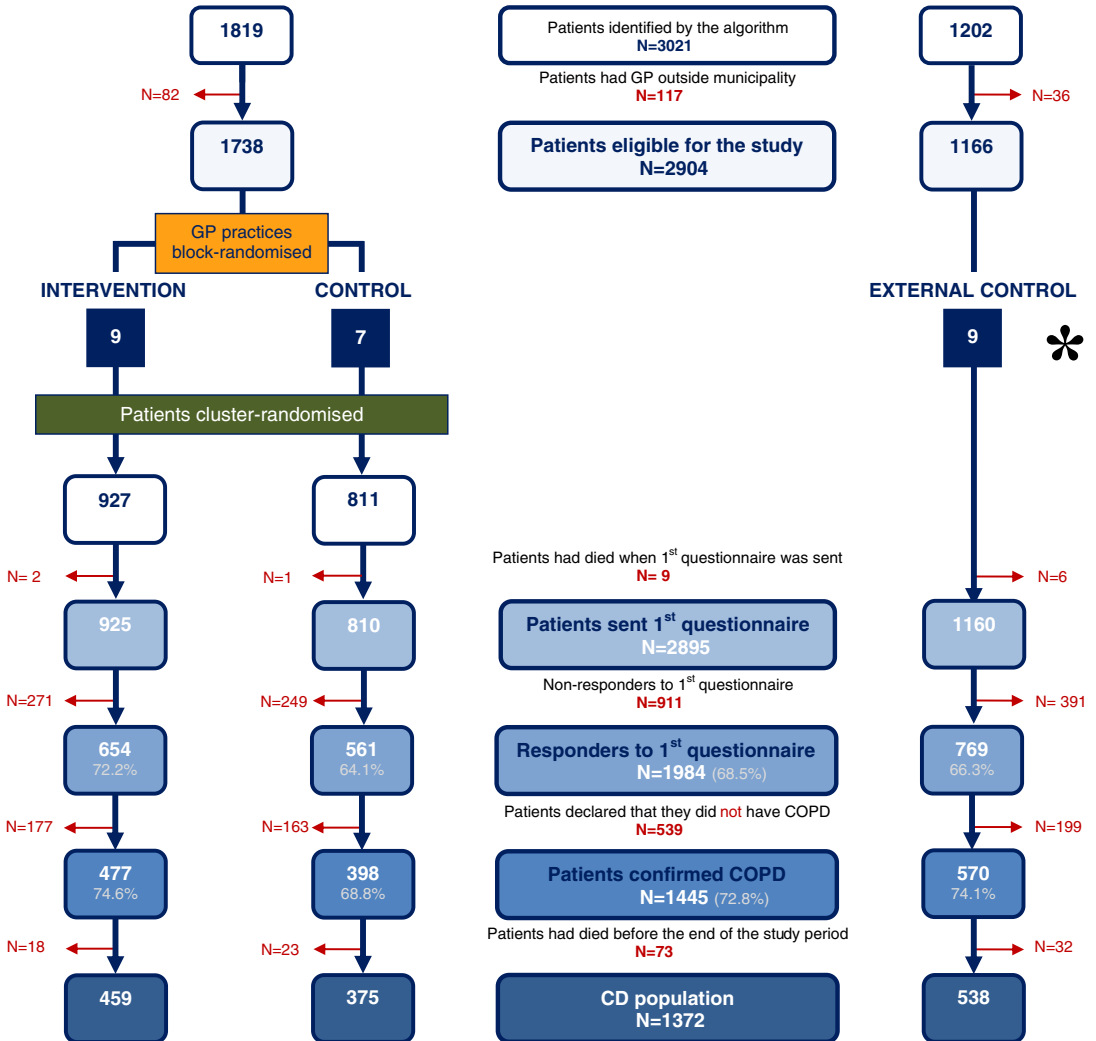

### DEFINITION OF SUB-GROUP FOR SENSITIVITY ANALYSIS:

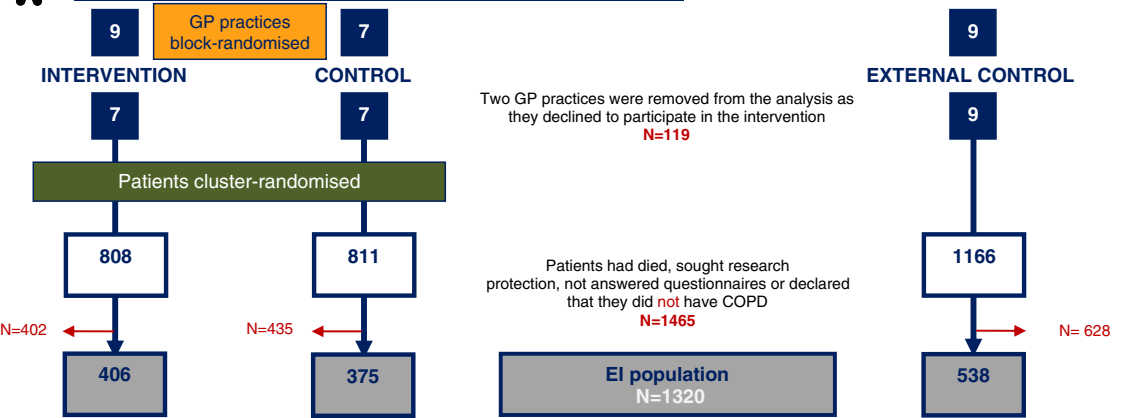

Supplement: MOESM2 [file 9531582]
